# Supplementary material for: Alteration of the Canine Metabolome After a 3-Week Supplementation of Cannabidiol (CBD) Containing Treats: An Exploratory Study of Healthy Animals
Source: Front Vet Sci. 2021 Jul 16;8:685606. doi: 10.3389/fvets.2021.685606 (PMC8322615; doi:10.3389/fvets.2021.685606)
Supplement: Supplementary Table 1 — Amine/phenol- and carbonyl-containing metabolites identified in the tier 1 chemical isotope labeling (CIL) library. [file Table_1.XLSX]

## Sheet: Sheet1
Supplementary Table 1. Amine/phenol- and carbonyl-containing metabolites identified in the tier 1 chemical isotope labeling (CIL) library.
HMDB No.	Compounds
HMDB00001	1-Methylhistidine
HMDB01414	1,4-Diaminobutane
HMDB00750	3-Hydroxymandelic acid
HMDB00750_2	3-Hydroxymandelic acid - COOH
HMDB00479	3-Methylhistidine
HMDB01336	3,4-Dihydroxybenzeneacetic acid
HMDB00500	4-Hydroxybenzoic acid
HMDB03355	5-Aminopentanoic acid
HMDB00450	5-Hydroxylysine
HMDB00050	Adenosine
HMDB00161	Alanine
HMDB28680	Alanyl-Alanine
HMDB0028685	Alanyl-Glutamine
HMDB0006899	Alanyl-Glycine
HMDB28689	Alanyl-Histidine
HMDB28691	Alanyl-Leucine
HMDB0028695	Alanyl-Proline
HMDB00510	Aminoadipic acid
HMDB00517	Arginine
HMDB0028708	Arginyl-Glutamic acid
HMDB0028727	Asparaginyl-Aspartic acid
HMDB00191	Aspartic Acid
HMDB0028749	Aspartyl-Aspartate
HMDB0028751	Aspartyl-Glutamine
HMDB0028753	Aspartyl-Glycine
HMDB0028757	Aspartyl-Leucine
HMDB0028763	Aspartyl-Threonine
HMDB00056	Beta-Alanine
HMDB02322	Cadaverine
HMDB00904	Citrulline
NA	Cysteinyl-Glycine dimer
HMDB00192	Cystine
HMDB00089_2	Cytidine - H2O
HMDB02199	Desaminotyrosine
HMDB00112	Gamma-Aminobutyric acid
HMDB00112_2	Gamma-Aminobutyric acid - H2O
HMDB00122	Glucose
HMDB00148	Glutamic Acid
HMDB00641	Glutamine
HMDB0028790	Glutaminyl-Alanine
HMDB0028795	Glutaminyl-Glutamine
HMDB0028814	Glutamyl-Asparagine
HMDB0028817	Glutamyl-Glutamine
HMDB0028819	Glutamyl-Glycine
HMDB0028825	Glutamyl-Methionine
HMDB0028828	Glutamyl-Serine
HMDB01051	Glyceraldehyde
HMDB00123	Glycine
HMDB0028838	Glycyl-Cysteine
HMDB0000759	Glycyl-Leucine
HMDB28854	Glycyl-Valine
HMDB01842	Guanidine
HMDB00177	Histidine
HMDB0028881	Histidinyl-Aspartate
HMDB0028884	Histidinyl-Glutamate
HMDB00670	Homoarginine
HMDB00679	Homocitrulline
HMDB00130	Homogentisic acid
HMDB00719	Homoserine
HMDB00719_2	Homoserine - H2O
HMDB00118	Homovanillic acid
HMDB00755	Hydroxyphenyllactici acid
HMDB00157	Hypoxanthine
HMDB00157_3	Hypoxanthine - Isomer
HMDB00734	Indoleacrylic acid
HMDB00955	Isoferulic acid
HMDB0028900	Isoleucyl-Alanine
HMDB0028906	Isoleucyl-Glutamate
HMDB00750_2	Isomer of 3-Hydroxymandelic acid - COOH
HMDB00500	Isomer of 4-Hydroxybenzoic acid
HMDB01051	Isomer of Glyceraldehyde
HMDB01051	Isomer of Glyceraldehyde
HMDB00259	Isomer of Serotonin
HMDB00687	Leucine
HMDB0028922	Leucyl-Alanine
HMDB0028925	Leucyl-Aspartate
HMDB0028928	Leucyl-Glutamate
HMDB0028927	Leucyl-Glutamine
HMDB0028932	Leucyl-Isoleucine
HMDB0011175	Leucyl-Proline
HMDB0028939	Leucyl-Threonine
HMDB00182	Lysine
HMDB0028959	Lysyl-Proline
HMDB00696	Methionine
HMDB02005	Methionine Sulfoxide
HMDB02005_2	Methionine Sulfoxide - Isomer
HMDB0028977	Methionyl-Leucine
HMDB02108	Methylcysteine
HMDB01522	Methylguanidine
HMDB00446	N-Alpha-acetyllysine
HMDB00206	N6-Acetyl-Lysine
HMDB00224	O-Phosphoethanolamine
HMDB06050	o-Tyrosine
HMDB28988	Phenylalanyl-Alanine
HMDB0028991	Phenylalanyl-Aspartate
HMDB28994	Phenylalanyl-Glutamate
HMDB28995	Phenylalanyl-Glycine
HMDB00162	Proline
HMDB0029010	Prolyl-Alanine
HMDB0029011	Prolyl-Arginine
HMDB0029012	Prolyl-Asparagine
HMDB0029015	Prolyl-Glutamine
HMDB0011178	Prolyl-Glycine
HMDB0029019	Prolyl-Histidine
NA	Prolyl-Isoleucine
NA	Prolyl-Leucine
HMDB0029022	Prolyl-Lysine
HMDB0029023	Prolyl-Methionine
HMDB0011180	prolyl-proline
HMDB0029026	Prolyl-Serine
HMDB0029027	Prolyl-Threonine
HMDB0029028	Prolyl-Tryptophan
HMDB0029029	Prolyl-Tyrosine
HMDB0029030	Prolyl-Valine
HMDB01856	Protocatechuic acid
HMDB00271	Sarcosine
HMDB00187	Serine
HMDB00259	Serotonin
HMDB0029035	Seryl-Aspartic acid
HMDB0029039	Seryl-Glycine
HMDB03334	Symmetric dimethylarginine
HMDB00251	Taurine
HMDB00167	Threonine
HMDB0029060	Threoninyl-Glutamate
HMDB0029069	Threoninyl-Proline
HMDB00262	Thymine
HMDB00929	Tryptophan
HMDB29090	Tryptophyl-Phenylalanine
HMDB00306	Tyramine
HMDB00158	Tyrosine
HMDB0029101	Tyrosyl-Aspartate
HMDB00300	Uracil
HMDB00883	Valine
HMDB0029120	Valyl-Alanine
HMDB0029126	Valyl-Glutamate
HMDB0029127	Valyl-Glycine
HMDB0029131	Valyl-Leucine
HMDB00484	Vanillic acid
